# Supplementary material
Source: publisher figshare collection journal article supplement (https://gsajournals.figshare.com/ndownloader/files/22312020)
Supplement: Supplementary file 1 [file 22312020]

## Sheet: Sheet1
S4 Table: List of genes that underwent Copy Number variation in the ILEs
GSY full duplicated genes with conditions
No.	Systematic name	Standard name	Media condition	Function
1	YDR041W	RSM10	YPD/YM/WYF	ribosomal small subunit of mitochondria
2	YDR043C	NRG1	YPD/YM/WYF	negative regulator of glucose repressed genes
3	YDR044W	HEM13	YPD/YM/WYF	heme biosynthesis
4	YDR045C	RPC11	YPD/YM/WYF	mediates RNApolIII activity
5	YDR046C	BAP3	YPD/YM/WYF	amino aid permease
6	YDR047W	HEM12	YPD/YM/WYF	heme biosynthesis
7	YDR049W	VMS1	YPD/YM/WYF	VCP associated mitochondrial stress response
8	YDR050C	TPI1	YPD/YM/WYF	triosephosphate isomerase, regulated by iron availability
9	YDR051C	DET1	YPD/YM/WYF	decreased ergosterol transport
10	YDR052C	DBF4	YPD/YM/WYF	required for cdc7 kinase activity
11	YDR054C	CDC34	YPD/YM/WYF	regulates cell cycle progression by targeting key substrates for degradation
12	YDR055W	PST1	YPD/YM/WYF	cell wall protein that contains GPI atachment
13	YDR056C	EMC10	YPD/YM/WYF	ER Membrane protein Complex
14	YDR057W	YOS9	YPD/YM/WYF	ER quality-control lectin
15	YDR058C	TGL2	YPD/YM/WYF	Triacylglycerol lipase that is localized to the mitochondria
16	YDR059C	UBC5	YPD/YM/WYF	Ubiquitin-conjugating enzyme
17	YDR060W	MAK21	YPD/YM/WYF	required for large (60S) ribosomal subunit biogenesis
18	YDR062W	LCB2	YPD/YM/WYF	Component of serine palmitoyltransferase- sphingolipid synthesis
19	YDR063W	AIM7	YPD/YM/WYF	Altered Inheritance rate of Mitochondria
20	YDR064W	RPS13	YPD/YM/WYF	Ribosomal Protein of the Small subunit
21	YDR065W	RRG1	YPD/YM/WYF	for respiratory growth and mitochondrial genome maintenance; localizes to the matrix side of the inner mitochondrial membrane
22	YDR066C	RTR2	YPD/YM/WYF	unknown function
23	YDR067C	OCA6	YPD/YM/WYF	Oxidant-induced Cell-cycle Arrest
24	YDR068W	DOS2	YPD/YM/WYF	unknown function
25	YDR069C	DOA4	YPD/YM/WYF	Ubiquitin hydrolase
26	YDR070C	FMP16	YPD/YM/WYF	unknown function, found in mitochondria
27	YDR071C	PAA1	YPD/YM/WYF	Polyamine acetyltransferase
28	YDR072C	IPT1	YPD/YM/WYF	Inositolphosphotransferase
29	YDR073W	SNF11	YPD/YM/WYF	Subunit of the SWI/SNF chromatin remodeling complex
30	YDR074W	TPS2	YPD/YM/WYF	Phosphatase subunit of the trehalose-6-P synthase/phosphatase complex
31	YDR075W	PPH3	YPD/YM/WYF	Catalytic subunit of protein phosphatase PP4 complex; regulates recovery from the DNA damage checkpoint
32	YDR076W	RAD55	YPD/YM/WYF	involved in the recombinational repair of double-strand breaks in DNA during vegetative growth and meiosis
33	YDR077W	SED1	YPD/YM/WYF	Major stress-induced structural GPI-cell wall glycoprotein
34	YDR078C	SHU2	YPD/YM/WYF	Component of Shu complex , and promotes error-free DNA repair
35	YDR079C-A	TFB5	YPD/YM/WYF	Component of RNA polymerase II general transcription factor TFIIH; involved in transcription initiation and in nucleotide-excision repair
36	YDR079W	PET100	YPD/YM/WYF	Chaperone that facilitates the assembly of cytochrome c oxidase; integral to the mitochondrial inner membrane;
37	YDR080W	VPS41	YPD/YM/WYF	Subunit of the HOPS endocytic tethering complex; vacuole membrane protein
38	YDR081C	PDC2	YPD/YM/WYF	Transcription factor for thiamine-regulated genes
39	YDR082W	STN1	YPD/YM/WYF	Telomere end-binding and capping protein
40	YDR083W	RRP8	YPD/YM/WYF	Nucleolar S-adenosylmethionine-dependent rRNA methyltransferase
41	YDR084C	TVP23	YPD/YM/WYF	Integral membrane protein; tlg2 vesicle protein
42	YDR085C	AFR1	YPD/YM/WYF	Protein required for pheromone-induced projection (shmoo) formation
43	YDR086C	SSS1	YPD/YM/WYF	Sec61 suppressor;Subunit of the Sec61p translocation complex that forms a channel for passage of secretory proteins through ER
44	YDR087C	RRP1	YPD/YM/WYF	biogenesis of 60S ribosomal subunits and for processing of pre-rRNAs to mature rRNA
45	YDR088C	SLU7	YPD/YM/WYF	RNA splicing factor
46	YDR089W	VTC5	YPD/YM/WYF	vacuolar transmembrane protein that regulates biosynthesis of polyphosphate
47	YDR091C	RLI1	YPD/YM/WYF	Essential Fe-S protein
48	YDR092W	UBC13	YPD/YM/WYF	E2 ubiquitin-conjugating enzyme; involved in the error-free DNA postreplication repair pathway
49	YDR093W	DNF2	YPD/YM/WYF	Aminophospholipid translocase; type 4 P-type ATPase; involved in phospholipid translocation, contributing to endocytosis, protein transport, and cellular polarization; localizes primarily to the plasma membrane
50	YDR096W	GIS1	YPD/YM/WYF	Histone demethylase and transcription factor; regulates genes during nutrient limitation
51	YDR097C	MSH6	YPD/YM/WYF	Protein required for mismatch repair in mitosis and meiosis
52	YDR098C	GRX3	YPD/YM/WYF	Glutathione-dependent oxidoreductase
53	YDR099W	BMH2	WYF/WYF	controls proteome at post-transcriptional level, binds proteins and DNA, involved in regulation of many processes including exocytosis, vesicle transport, Ras/MAPK signaling, and rapamycin-sensitive signaling
54	YDR100W	TVP15	WYF/WYF	Integral membrane protein; localized to late Golgi vesicles
55	YDR101C	ARX1	WYF/WYF	Nuclear export factor for the ribosomal pre-60S subunit
56	YDR103W	STE5	WYF/WYF	Pheromone-responsive MAPK scaffold protein
57	YDR104C	SPO71	WYF/WYF	Meiosis-specific protein required for prospore membrane morphogenesis
58	YDR105C	TMS1	WYF/WYF	Vacuolar membrane protein of unknown function; is conserved in mammals; predicted to contain eleven transmembrane helices; interacts with Pdr5p, a protein involved in multidrug resistance
59	YDR106W	ARP10	WYF/WYF	Actin-Related Protein
60	YDR107C	TMN2	WYF/WYF	Protein with a role in cellular adhesion and filamentous growth
61	YDR108W	TRS85	WYF/WYF	Component of transport protein particle (TRAPP) complex III
62	YDR110W	FOB1	WYF/WYF	Nucleolar protein that binds the rDNA replication fork barrier site; required for replication fork blocking, recombinational hotspot activity,
63	YDR111C	ALT2	WYF/WYF	Catalytically inactive alanine transaminase
64	YDR112W	IRC2	WYF/WYF	Dubious open reading frame; unlikely to encode a functional protein,
65	YDR113C	PDS1	WYF/WYF	Securin; inhibits anaphase by binding separin Esp1p; blocks cyclin destruction and mitotic exit, essential for meiotic progression and mitotic cell cycle arrest
66	YDR115W	MRX14	WYF/WYF	Putative mitochondrial ribosomal protein of the large subunit
67	YDR116C	MRPL1	WYF/WYF	Mitochondrial ribosomal protein of the large subunit
68	YDR117C	TMA64	WYF/WYF	Protein of unknown function that associates with ribosomes
69	YDR118W	APC4	WYF/WYF	Subunit of the Anaphase-Promoting Complex/Cyclosome (APC/C); APC/C is a ubiquitin-protein ligase required for degradation of anaphase inhibitors
70	YDR119W	VBA4	WYF/WYF	Vacuolar Basic Amino acid transporter
71	YDR119W-A	COX26	WYF/WYF	Stabilizes or regulates formation of respiratory chain supercomplexes composed of Complex III (ubiquinol-cytochrome c reductase) and Complex IV (cytochrome c oxidase
72	YDR120C	TRM1	WYF/WYF	tRNA methyltransferase
73	YDR121W	DPB4	WYF/WYF	Subunit of DNA pol epsilon and of ISW2 chromatin accessibility complex; involved in both chromosomal DNA replication and inheritance of telomeric silencing
74	YDR122W	KIN1	WYF/WYF	S/T protein kinase
75	YDR123C	INO2	WYF/WYF	transcription factor,required for derepression of phospholipid biosynthetic genes in response to inositol depletion;
76	YDR125C	ECM18	WYF/WYF	Protein of unknown function
77	YDR126W	SWF1	WYF/WYF	Palmitoyltransferase that acts on transmembrane proteins; spore wall formation
78	YDR127W	ARO1	WYF/WYF	biosynthesis of chorismate,
79	YDR128W	MTC5	WYF/WYF	redundantly inhibit the TORC1 inhibitory role of the Iml1p/SEACIT (Iml1p-Npr2p-Npr3p) subcomplex, a GAP for GTPase Gtr1p (EGOC subunit) in response to amino acid limitation, thereby resulting in activation of TORC1 signaling
80	YDR129C	SAC6	WYF/WYF	cooperates with Scp1p in organization and maintenance of the actin cytoskeleton
81	YDR130C	FIN1	WYF/WYF	Spindle pole body-related intermediate filament protein
YJM789 full duplicated genes with conditions
1	YBL014C	RRN6	WYF	rDNA transcription factor complex
2	YBL015W	ACH1	WYF	protein with CoA transferase activity
3	YBL016W	FUS3	WYF	MAPK involved in mating
4	YBL017C	PEP1	WYF	receptor for vacuolar hydrolases
5	YBL018C	POP8	WYF	processing precursor RNAs
6	YBL030C	PET9	WYF	ATP/ADP carrier of mitochondrial inner membrane
7	YBL031W	SHE1	WYF	mitotic spindle protein
8	YBL032W	HEK2	WYF	rna binding prot involved in asymmetric localization of ASH1, regulates telomere position effect and length
9	YBL033C	RIB1	WYF	riboflavin biosynthesis pathway
10	YBR125C	PTC4	WYF	overexpression decreases high-osmolarity induced Hog1 phosphorylation and kinase activity
11	YBR126C	TPS1	WYF	trehalose-6-p synthase
12	YBR126W-A	MEO1	WYF	localizes to ER
13	YBR127C	VMA2	WYF	vacuolar membrane ATPase
14	YBR128C	ATG14	WYF	autophagy subunit of phosphotidylinositol-3 kinase
15	YDL020C	RPN4	WYF	regulated by stress response
16	YDL021W	GPM2	WYF	glycerate phosphomutase
17	YDL022W	GPD1	WYF	glycerol-3p dehydrogenase
18	YDL024C	DIA3	WYF	pseudohyphal growth
19	YDL024C	HBT1	WYF	shmoo tip protein
20	YDL224C	WHI4	WYF	regulates cell size requirement for start through commitment to cell division
21	YDL225W	SHS1	WYF	increase in response to DNA replication damage
22	YDL226C	GCS1	WYF	required for prospore formation
23	YKL086W	SRX1	WYF	Sulfiredoxin; contributes to oxidative stress resistance by reducing cysteine-sulfinic acid groups in the peroxiredoxin Tsa1p, which is formed upon exposure to oxidants;
24	YMR067C	UBX4	WYF	UBiquitin regulatory X
25	YMR068W	AVO2	WYF	Component of a complex containing the Tor2p kinase and other proteins; complex may have a role in regulation of cell growth
26	YMR069W	NAT4	WYF	N alpha-acetyl-transferase
27	YMR070W	MOT3	WYF	Transcriptional repressor, activator; role in cellular adjustment to osmotic stress
28	YMR071C	TVP18	WYF	Integral membrane protein; localized to late Golgi vesicles
29	YMR072W	ABF2	WYF	Mitochondrial DNA-binding protein;
30	YMR073C	IRC21	WYF	Protein of unknown function; may be involved in resistance to carboplatin and cisplatin
31	YMR074C	SDD2	WYF	Protein with homology to human PDCD5; PDCD5 is involved in programmed cell death
32	YMR075W	RCO1	WYF	Essential component of the Rpd3S histone deacetylase complex
33	YMR276W	DSK2	WYF	Nuclear-enriched ubiquitin-like polyubiquitin-binding protein; required for spindle pole body (SPB) duplication and for transit through the G2/M phase of the cell cycle
34	YNL240C	NAR1	WYF	Subunit of the cytosolic iron-sulfur (FeS) protein assembly machinery
35	YNL241C	ZWF1	WYF	Glucose-6-phosphate dehydrogenase (G6PD); catalyzes the first step of the pentose phosphate pathway; involved in adapting to oxidative stress
AWRI1631 full duplicated genes with conditions
1	YBL014C	RRN6	YM	rDNA transcription factor complex
2	YBL015W	ACH1	YM	protein with CoA transferase activity
3	YBL016W	FUS3	YM	MAPK involved in mating
4	YBL017C	PEP1	YM	receptor for vacuolar hydrolases
5	YBL018C	POP8	YM	processing precursor RNAs
6	YBL030C	PET9	YM	ATP/ADP carrier of mitochondrial inner membrane
7	YBL031W	SHE1	YM	mitotic spindle protein
8	YBL032W	HEK2	YM	rna binding prot involved in asymmetric localization of ASH1, regulates telomere position effect and length
9	YBL033C	RIB1	YM	riboflavin biosynthesis pathway
10	YBR125C	PTC4	YM	overexpression decreases high-osmolarity induced Hog1 phosphorylation and kinase activity
11	YBR126C	TPS1	YM	trehalose-6-p synthase
12	YBR126W-A	MEO1	YM	localizes to ER
13	YBR127C	VMA2	YM	vacuolar membrane ATPase
14	YDL010W	GRX6	YM	monothiolglutaredoxin binds to Fe-S cluster
15	YDL015C	TSC13	YM	temperature sensitive suppressor of Csg2
16	YDL017W	CDC7	YM	ser/thr kinase
17	YDL017W	ERP3	YM	ER to golgi transport
18	YDL020C	RPN4	YPD/YM	regulated by stress response
19	YDL021W	GPM2	YPD/YM	glycerate phosphomutase
20	YDL022W	GPD1	YPD/YM	glycerol-3p dehydrogenase
21	YDL024C	DIA3	YPD/YM	pseudohyphal growth
22	YDL219W	DTD1	YM	D-Tyr-deacetylase
23	YDR188W	CCT6	YM	Subunit of the cytosolic chaperonin Cct ring complex; related to Tcp1p, essential protein that is required for the assembly of actin and tubulins in vivo
24	YHR215W	PHO12	YPD	glycoprotein that is transported to the cell surface by the secretory pathway; pregulated by phosphate starvation
25	YHR216W	IMD2	YPD	Inosine monophosphate dehydrogenase
26	YML130C	ERO1	YPD	Thiol oxidase required for oxidative protein folding in the ER
27	YMR067C	UBX4	YM	UBiquitin regulatory X
28	YMR068W	AVO2	YM	Component of a complex containing the Tor2p kinase and other proteins; complex may have a role in regulation of cell growth
29	YMR069W	NAT4	YM	N alpha-acetyl-transferase
30	YMR070W	MOT3	YM	Transcriptional repressor, activator; role in cellular adjustment to osmotic stress
31	YMR071C	TVP18	YM	Integral membrane protein; localized to late Golgi vesicles
32	YMR072W	ABF2	YM	Mitochondrial DNA-binding protein;
33	YMR073C	IRC21	YM	Protein of unknown function; may be involved in resistance to carboplatin and cisplatin
34	YMR074C	SDD2	YM	Protein with homology to human PDCD5; PDCD5 is involved in programmed cell death
35	YMR075W	RCO1	YM	Essential component of the Rpd3S histone deacetylase complex
36	YMR276W	DSK2	YM	Nuclear-enriched ubiquitin-like polyubiquitin-binding protein; required for spindle pole body (SPB) duplication and for transit through the G2/M phase of the cell cycle
RM11 full duplicated genes with conditions
none
